# Supplementary material
Source: PubMed Central journal article supplement (PMC7335736)
Supplement: mmc1.pdf [file mmc1.pdf]

YMTHE, Volume 28

## **Supplemental Information**

### **Split AAV-Mediated Gene Therapy**

### **Restores Ureagenesis in a Murine Model**

### **of Carbamoyl Phosphate Synthetase 1 Deficiency**

**Matthew Nitzahn, Gabriella Allegri, Suhail Khoja, Brian Truong, Georgios Makris, Johannes Häberle, and Gerald S. Lipshutz**

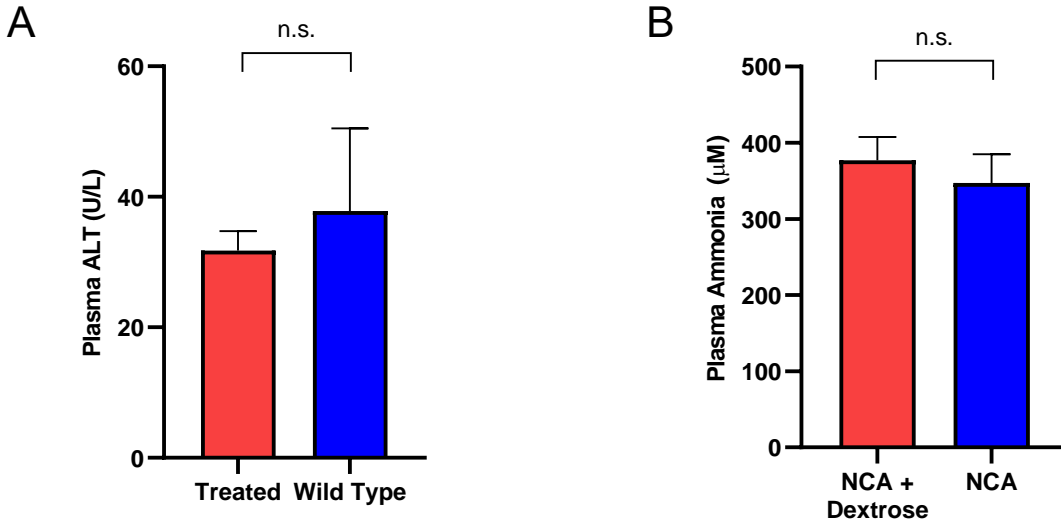

**Supplemental Figure 1.** **A)** Plasma alanine aminotransferase levels in sAAV-treated (n=4) and wild type (n = 5) mice are depicted, p = 0.69. **B)** Plasma ammonia levels are depicted in mice that received NCA with or without 5% dextrose (n = 5 mice per group), p = 0.80. Data is presented as the mean ± SEM. ALT, alanine aminotransferase; NCA, N-carglumic acid; n.s., not significant; SEM, standard error of the mean.

**Supplemental Table 1.** Ammonia challenge behavioral scores. Scores are out of 7; N/A denotes mice that perished prior to scoring.

| <u>Treated Females</u> |       | <u>Treated Males</u> |       |
|------------------------|-------|----------------------|-------|
| Mouse                  | Score | Mouse                | Score |
| 1                      | 6     | 1                    | N/A   |
| 2                      | 4     | 2                    | 3     |
| 3                      | 7     | 3                    | 4     |
| 4                      | 7     | 4                    | 3     |
| 5                      | 6     | 5                    | 6     |

**Supplemental Table 2.** List of primers

| <b>DNA PCR</b>                       | <b>Sequence</b>                                        | <b>Amplicon Size (bp)</b> |
|--------------------------------------|--------------------------------------------------------|---------------------------|
| LF<br>LR                             | CGGAGCTGAAGTCCATCTTGTCC<br>CAGCCGCGCATTCACTTCGAT       | 1444                      |
|                                      |                                                        |                           |
| RF<br>RR                             | ATCGAAGTGAATGCGCGGCTG<br>TCCCACCGAGGAATCTTAGTCACCATATA | 194                       |
|                                      |                                                        |                           |
|                                      |                                                        |                           |
| <b>qPCR</b>                          |                                                        |                           |
| Left sAAV F<br>Left sAAV R           | GGTTACGCTCTCGATAAATACGC<br>CCCTCGTTTGTCTGATCATTT       | 77                        |
|                                      |                                                        |                           |
| Right sAAV F<br>Right sAAV R         | TACCCAACAACCTTGCTGTACCT<br>GAGCTTGAGCGACTTTGAGTTCGT    | 135                       |
|                                      |                                                        |                           |
| Total CPS1 F<br>Total CPS1 R         | CTTTGGCCATCCCTCCTCTG<br>TTGGCCATGGTGAGGATCTG           | 114                       |
|                                      |                                                        |                           |
| $\beta$ -Actin F<br>$\beta$ -Actin R | CTAAGGCCAACCGTGAAAAG<br>ACCAGAGGCATACAGGGACA           | 104                       |

|         |                      |     |
|---------|----------------------|-----|
|         |                      |     |
| GAPDH F | GCTCTCTGCTCCTCCTGTTC | 115 |
| GAPDH R | ACGACCAAATCCGTTGACTC |     |
